# Supplementary material
Source: bioRxiv or medRxiv preprint supplement (https://medrxiv.org/highwire/filestream/81352/field_highwire_adjunct_files/0/2020.05.15.20102608-1.pdf)

### ALABAMA

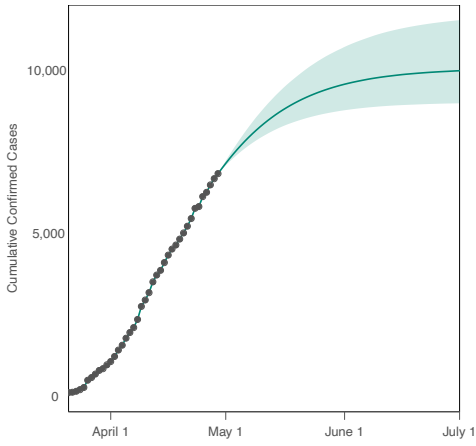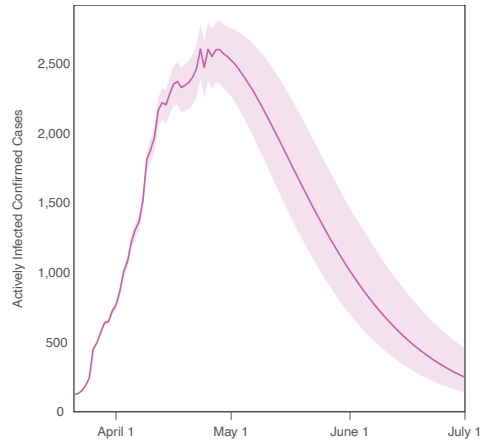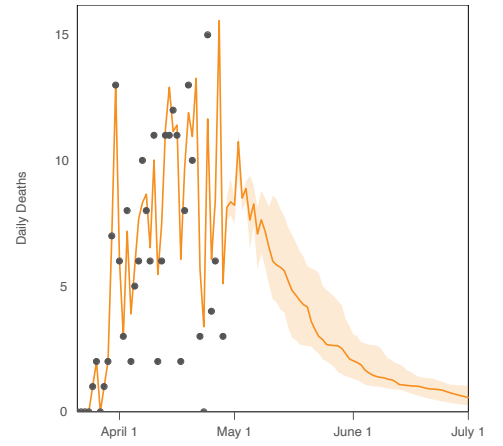

### ALASKA

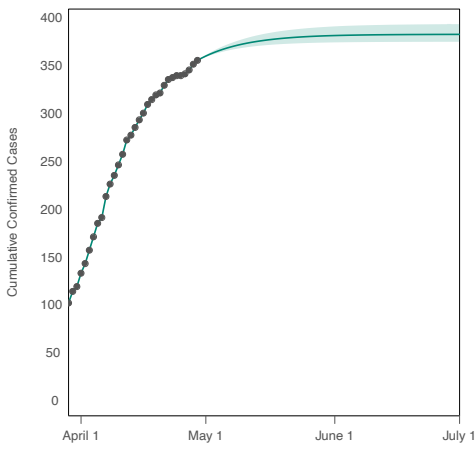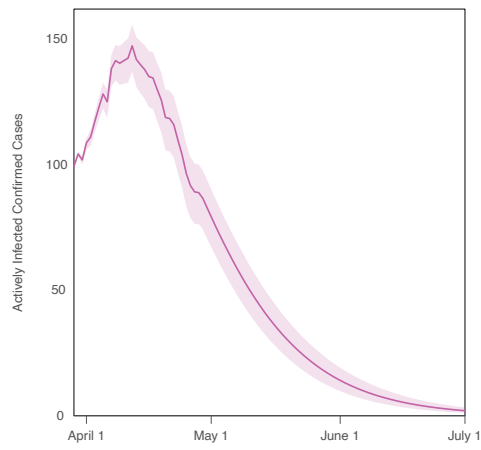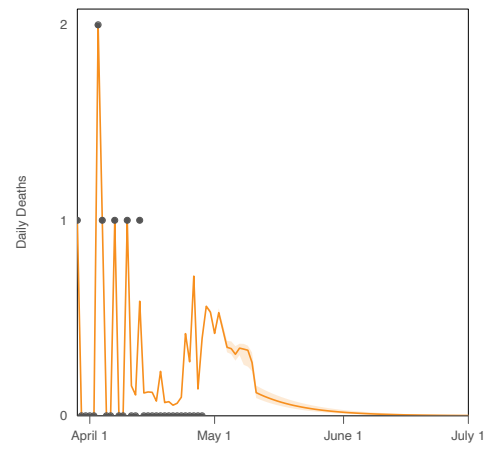

### ARIZONA

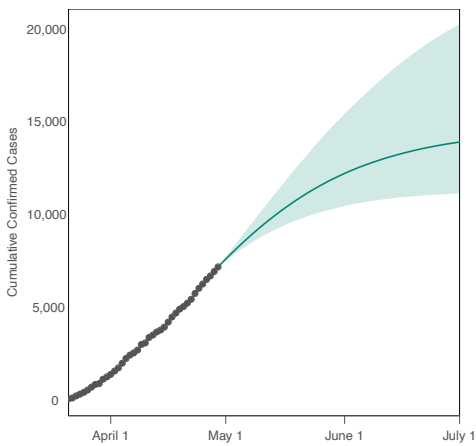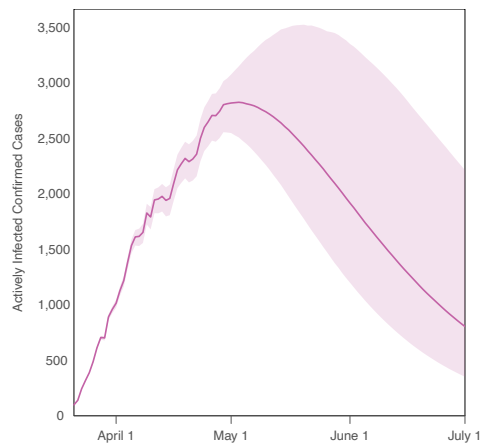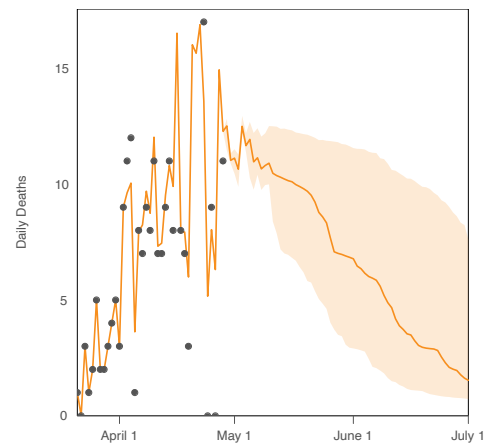

### ARKANSAS

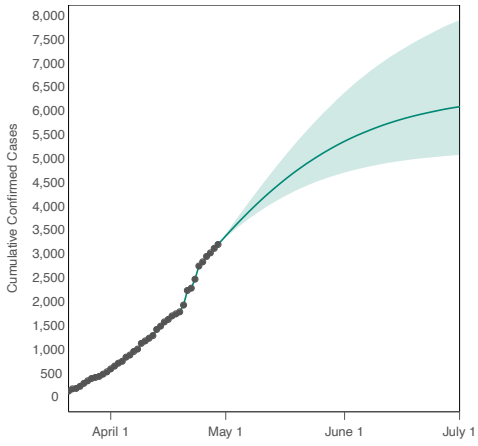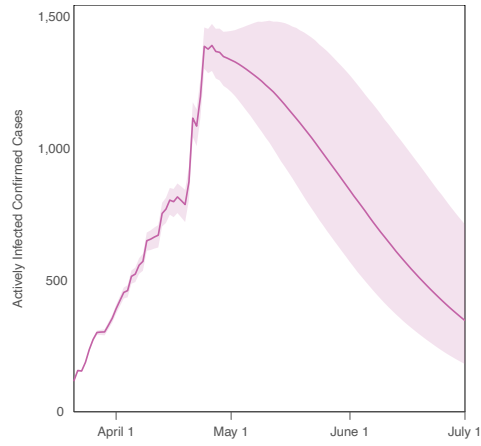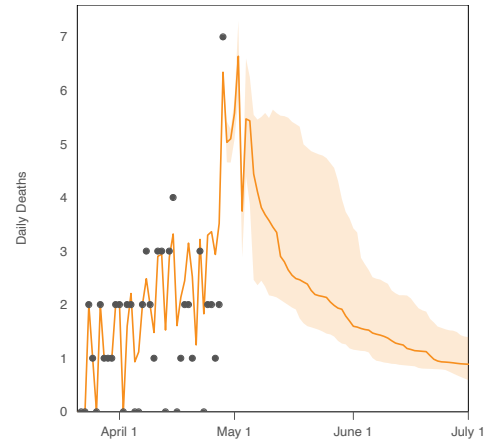

### CALIFORNIA

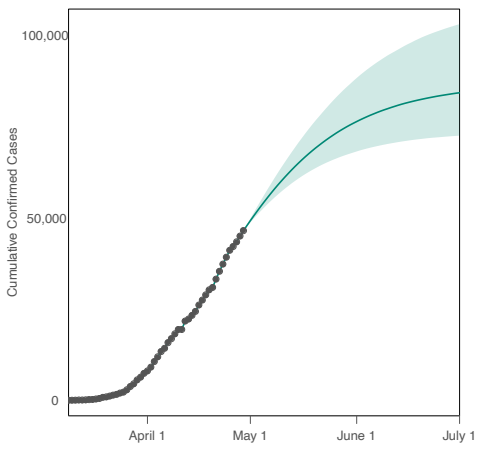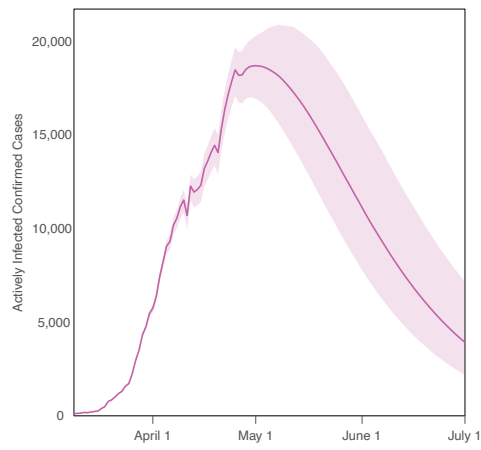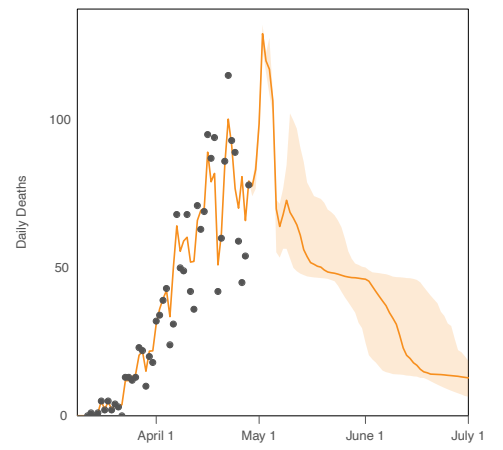

### COLORADO

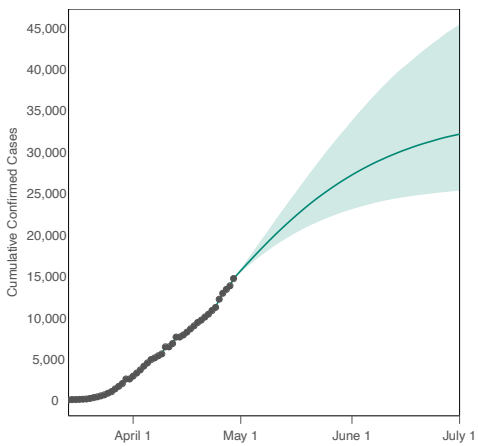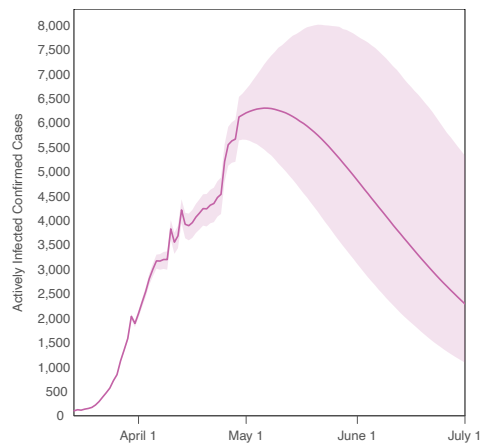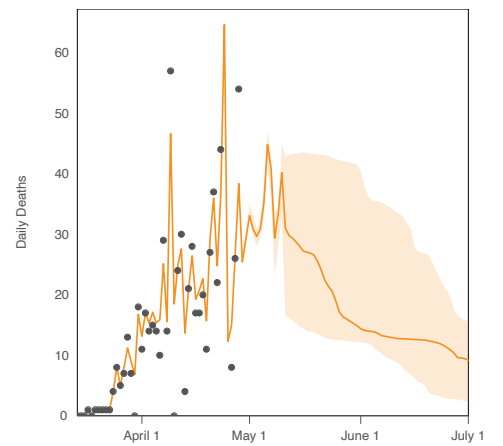

### CONNECTICUT

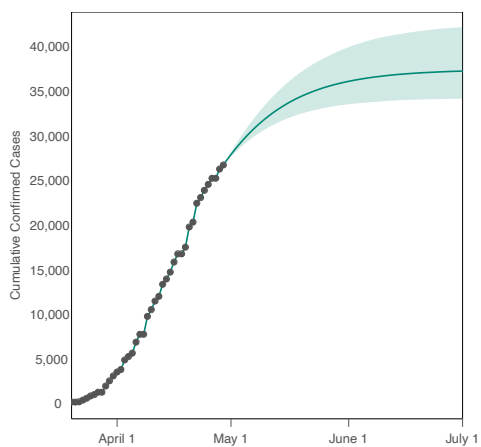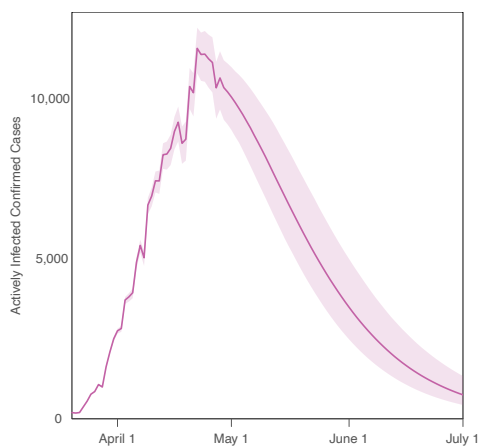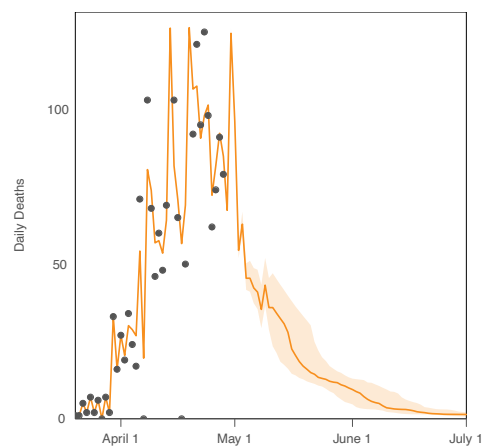

### DELAWARE

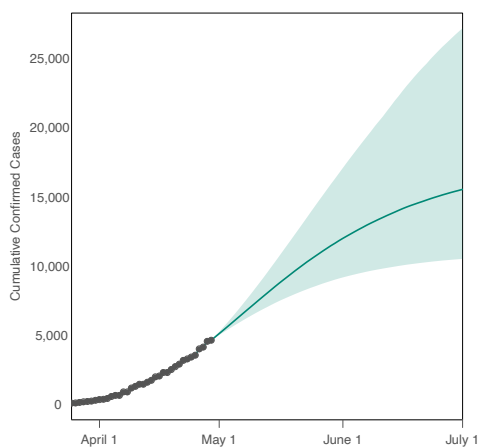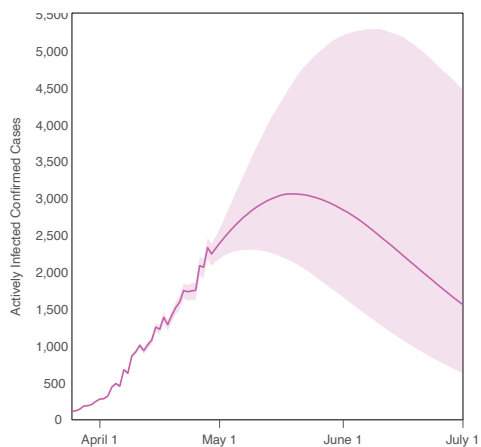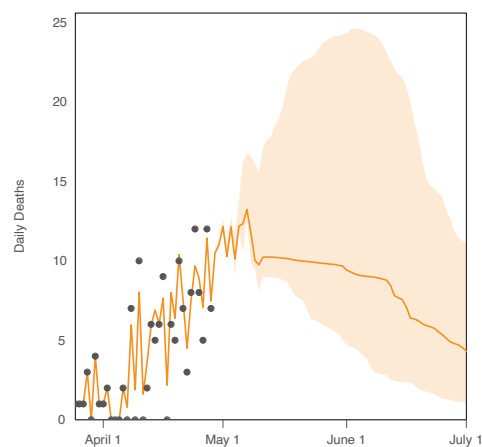

### FLORIDA

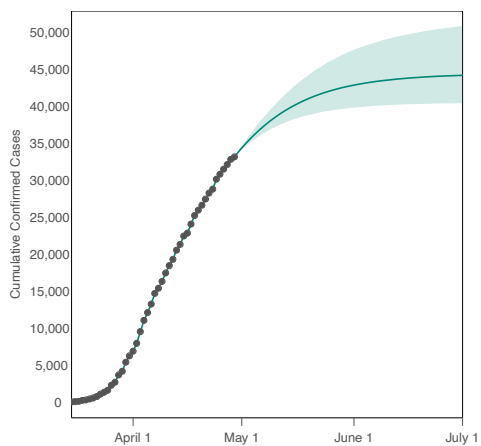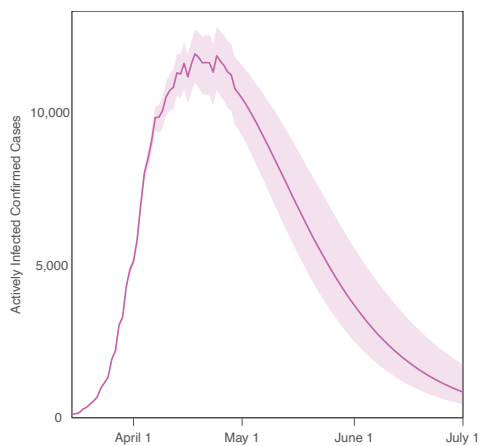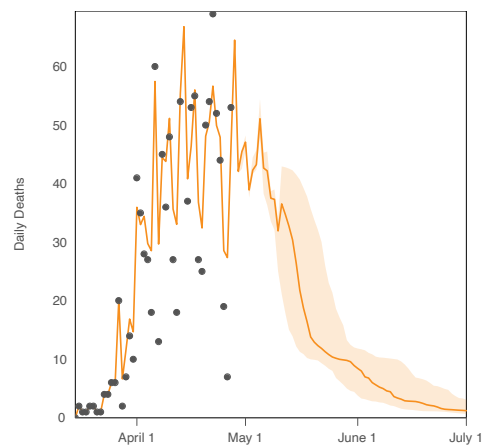

## GEORGIA

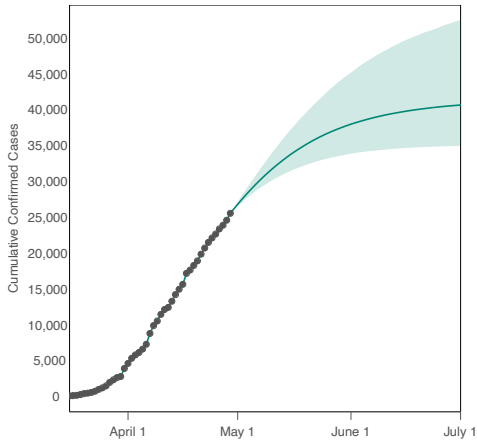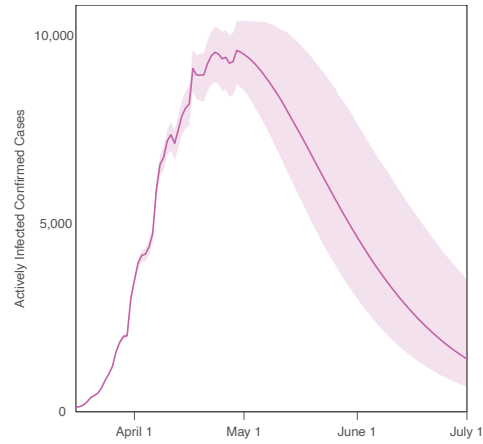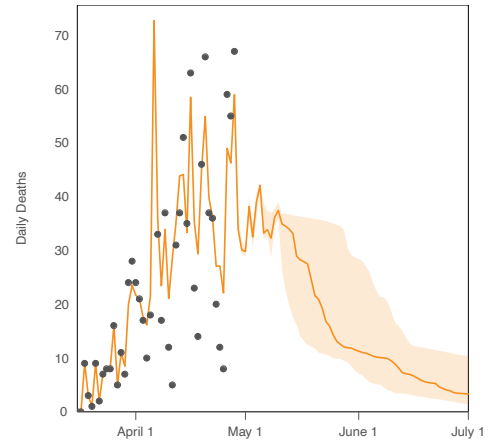

## HAWAII

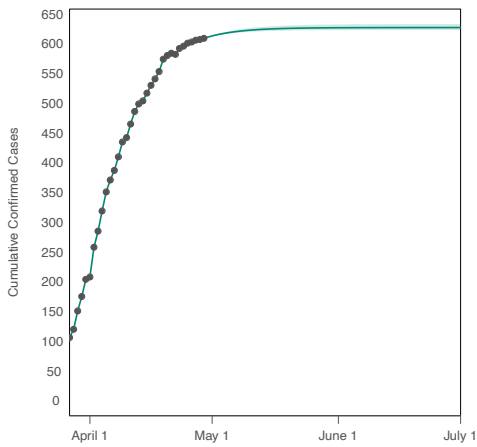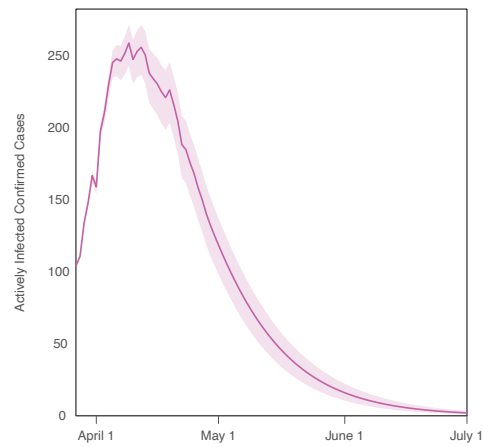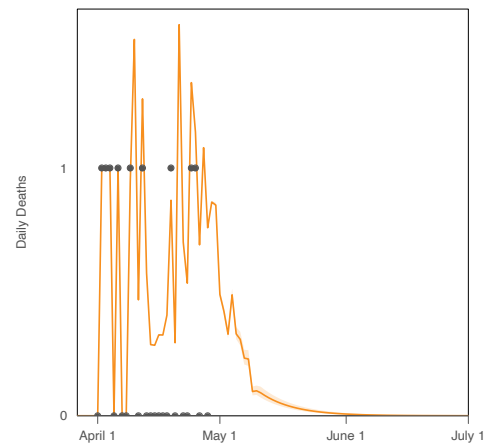

## IDAHO

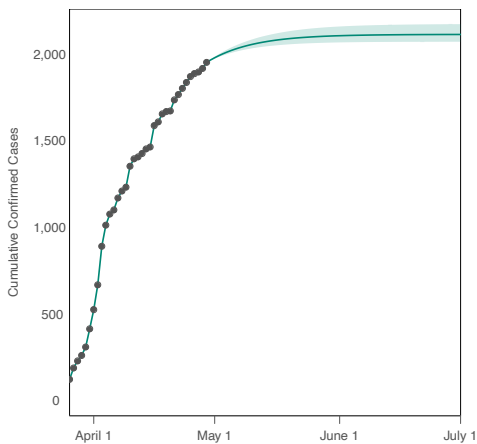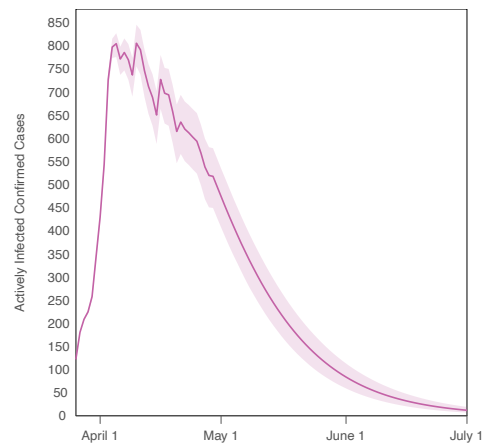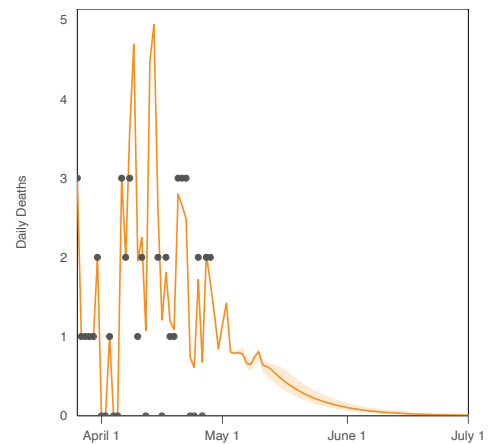

## ILLINOIS

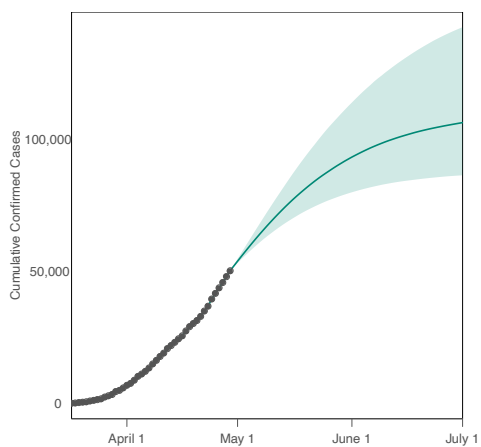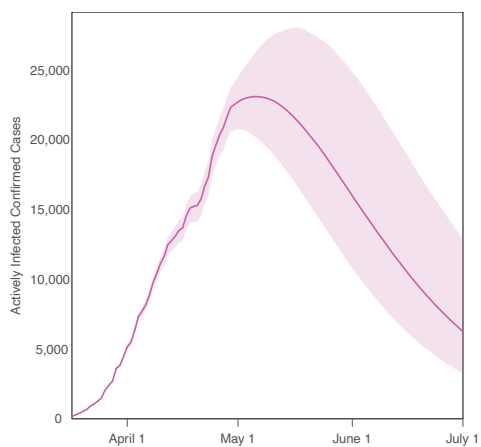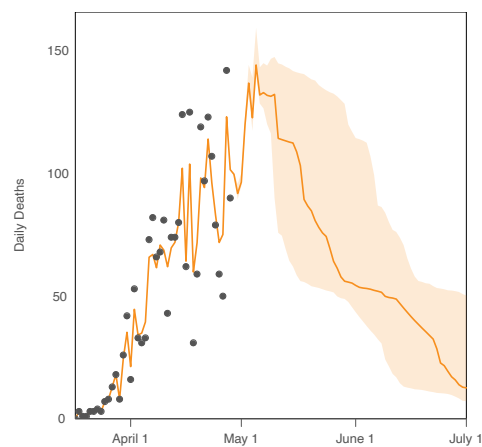

## INDIANA

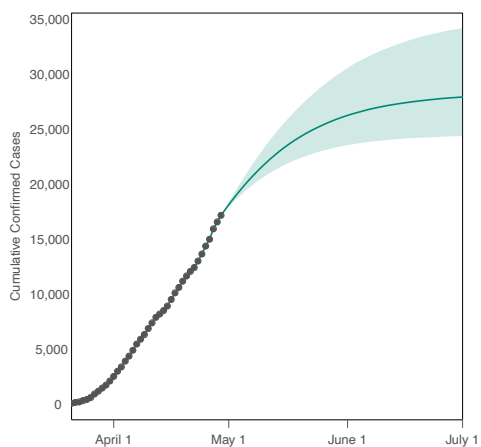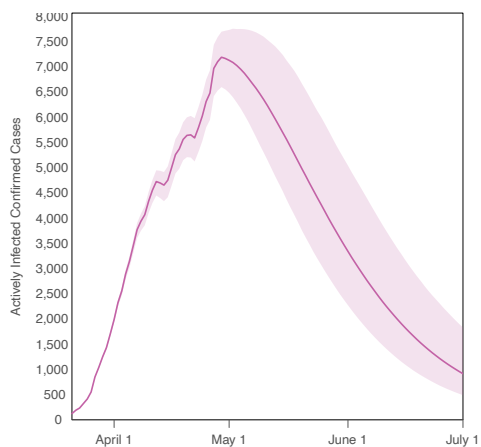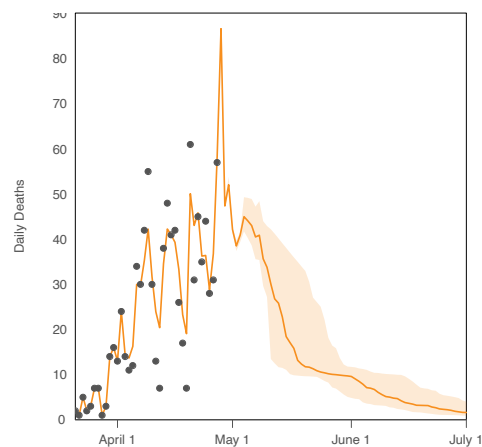

## IOWA

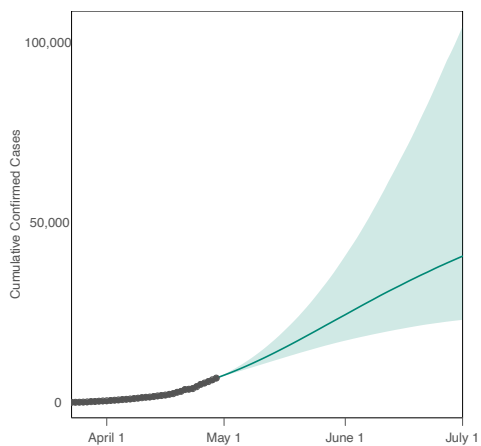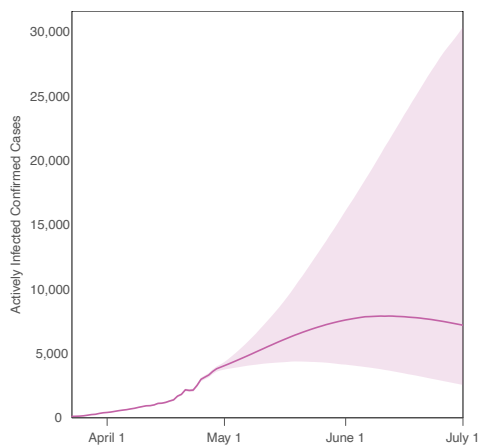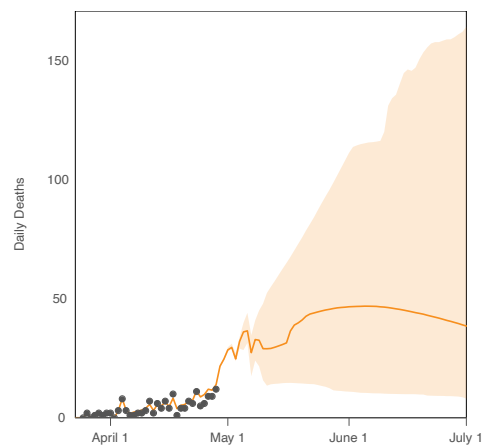

## KANSAS

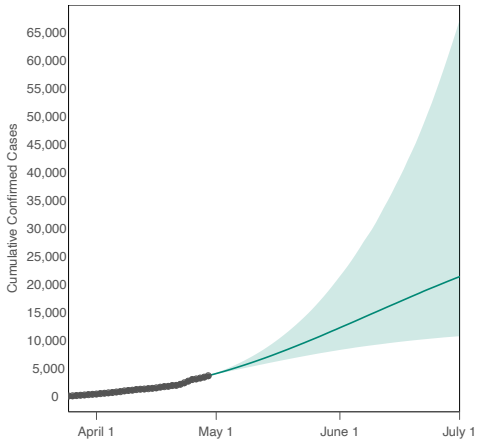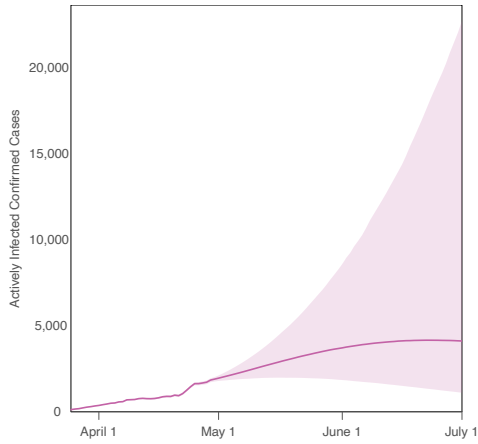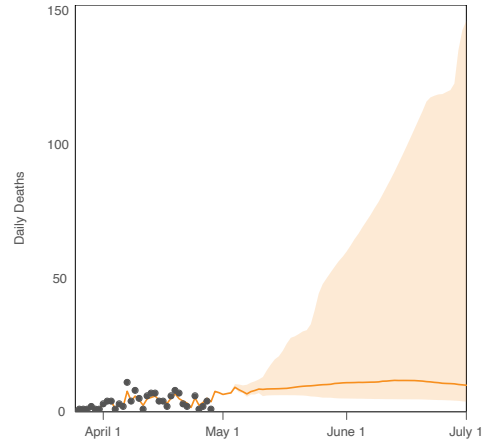

## KENTUCKY

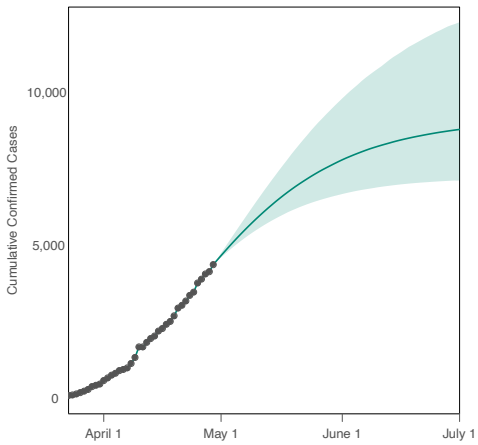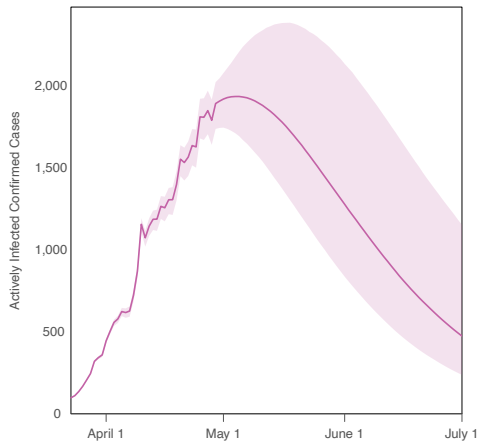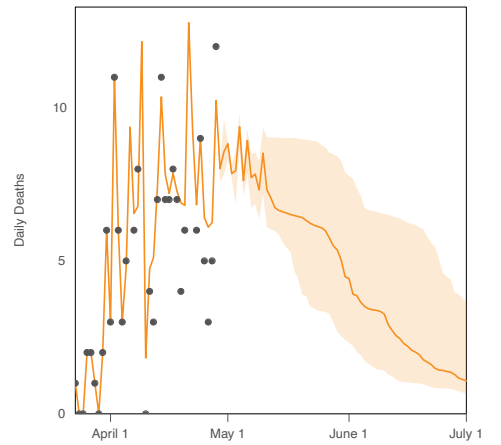

## LOUISIANA

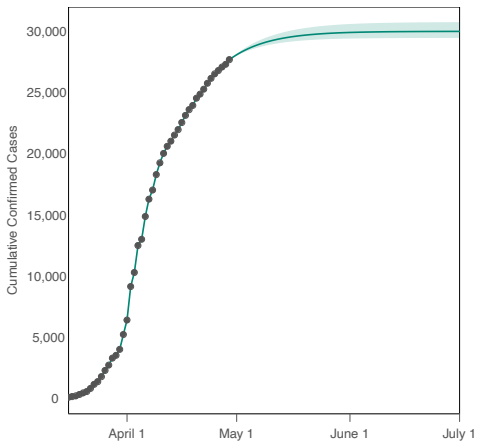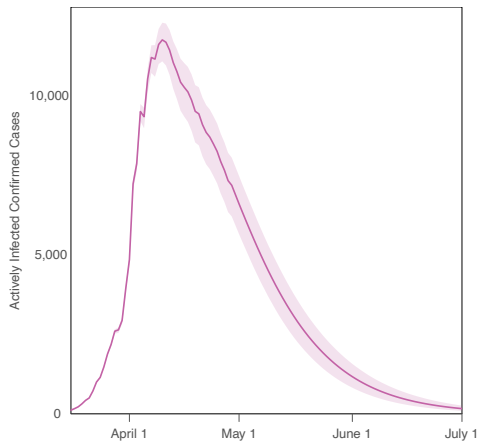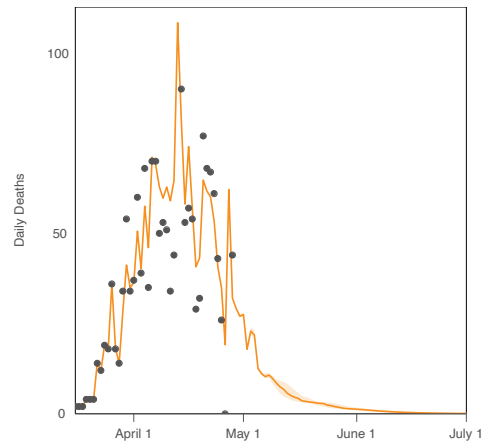

### MAINE

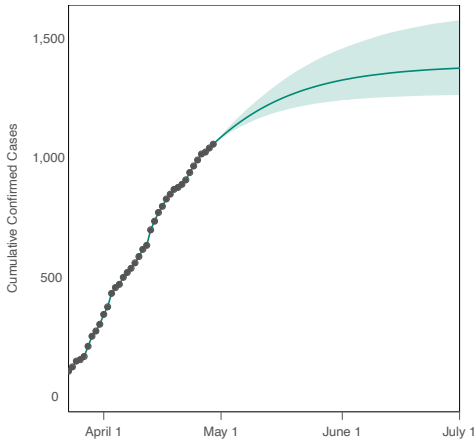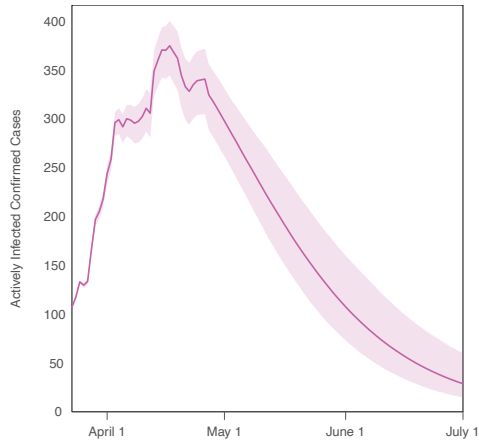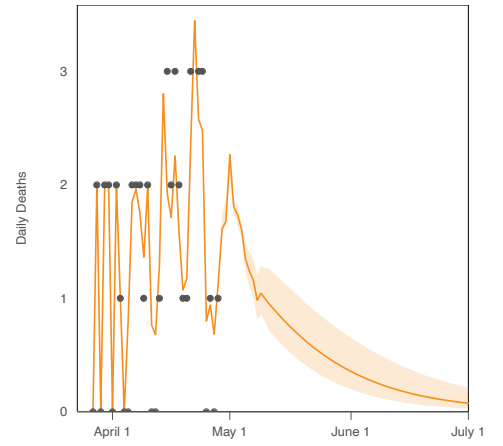

### MARYLAND

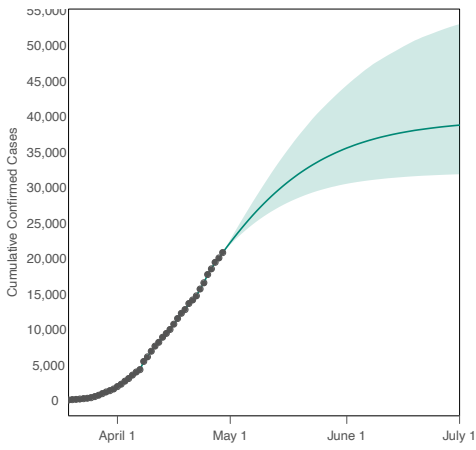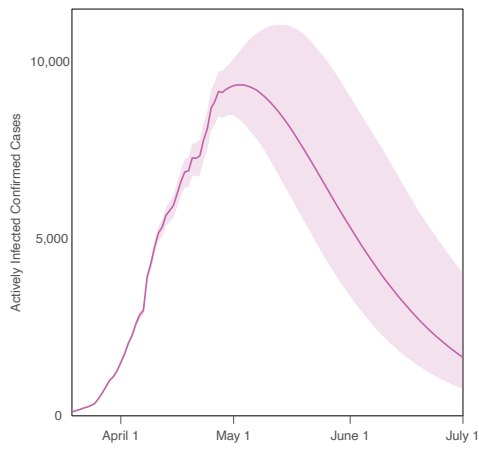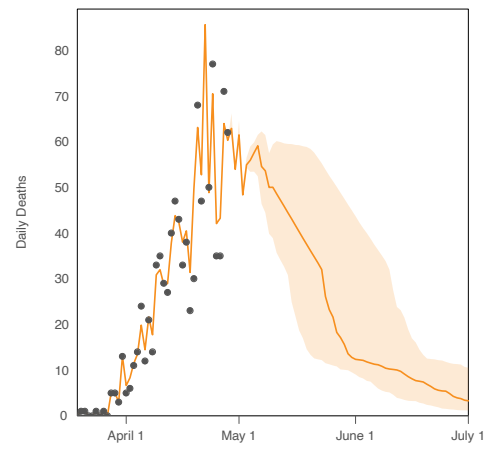

### MASSACHUSETTS

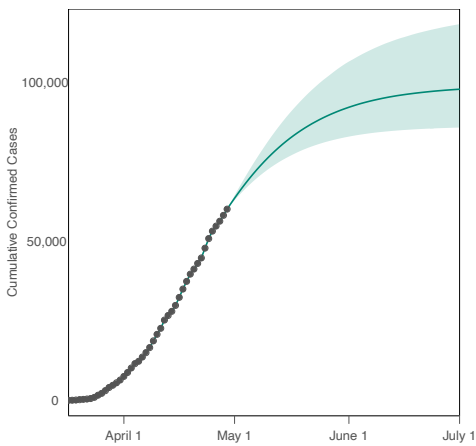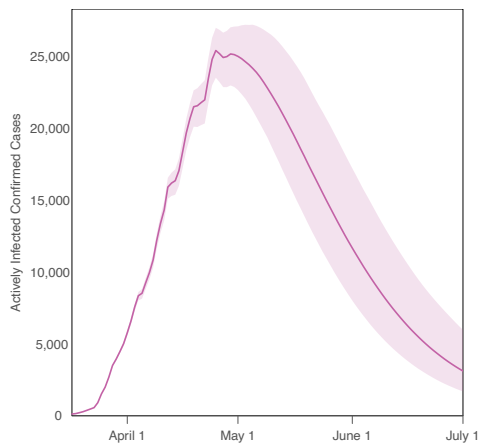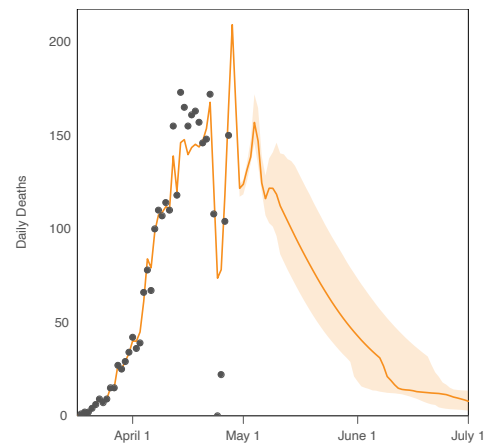

### MICHIGAN

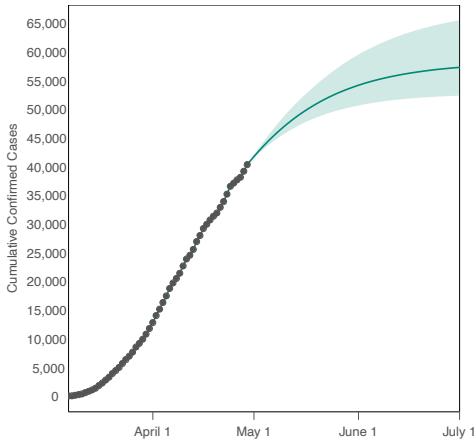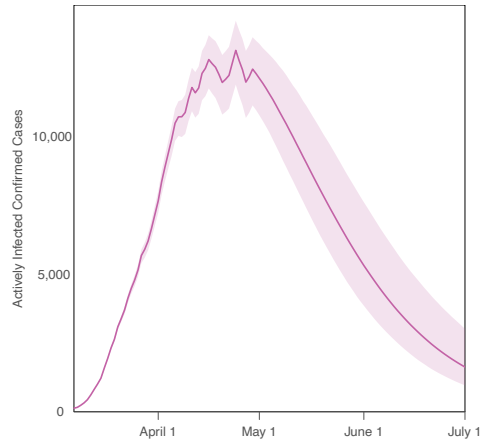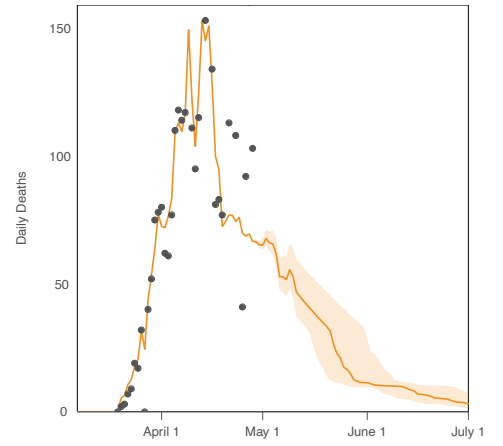

### MINNESOTA

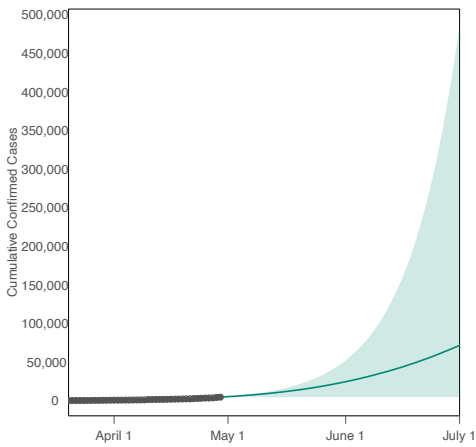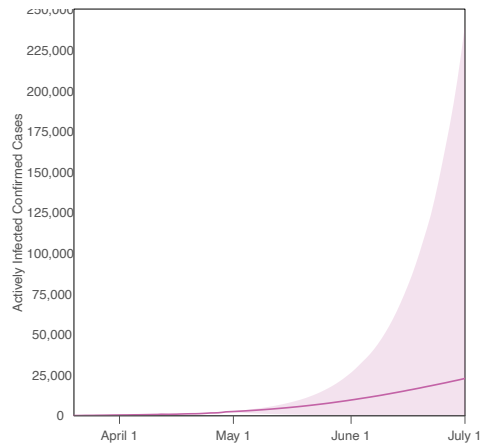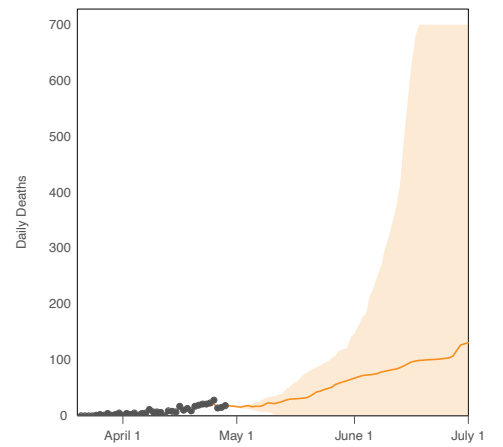

### MISSISSIPPI

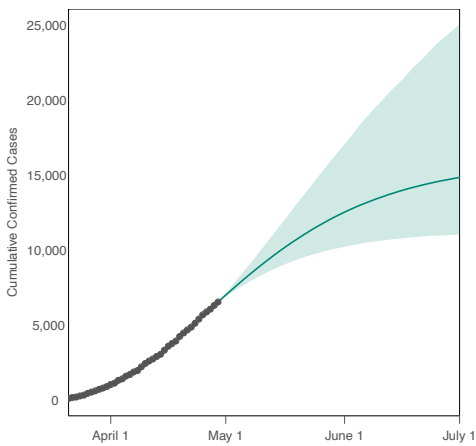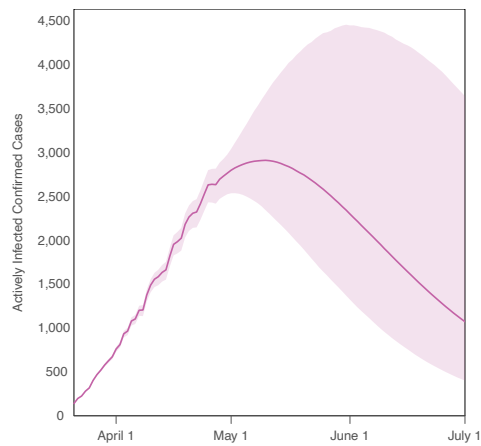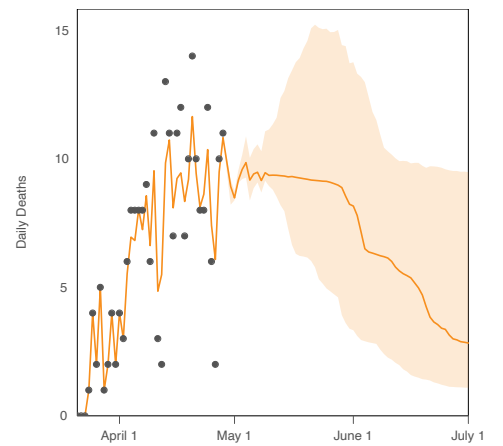



## MISSOURI

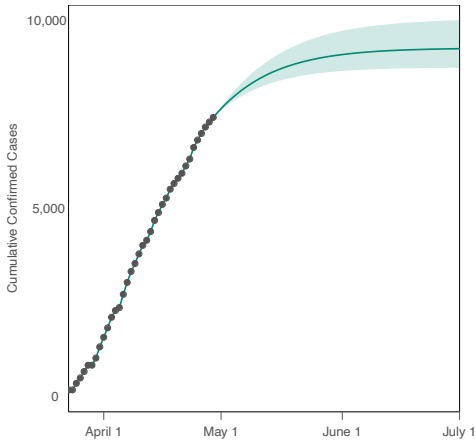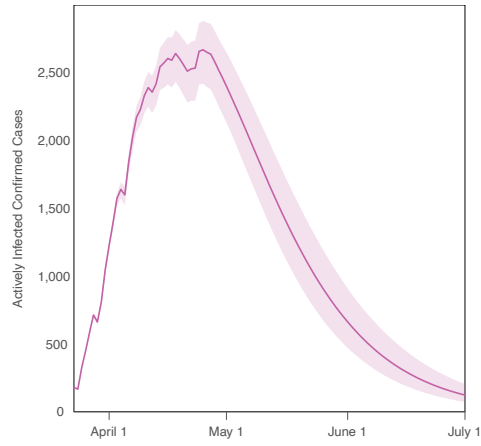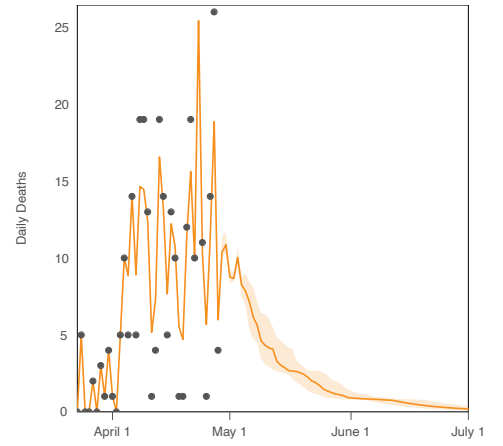

## MONTANA

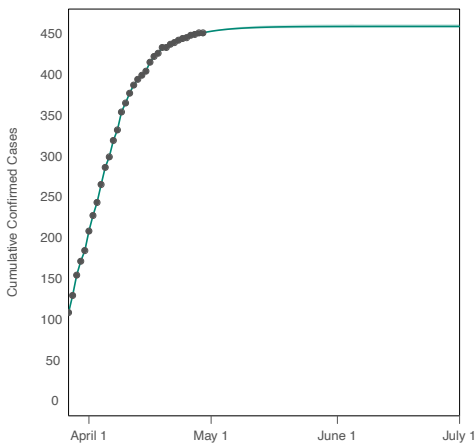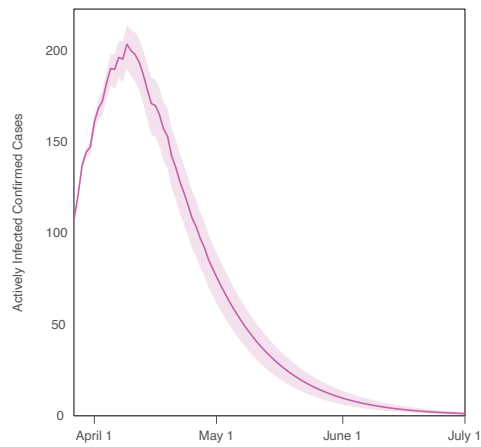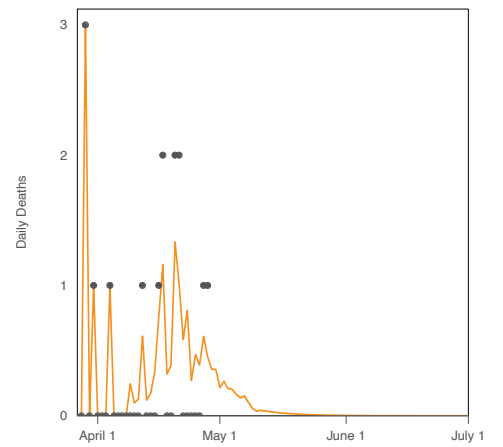

## NEBRASKA

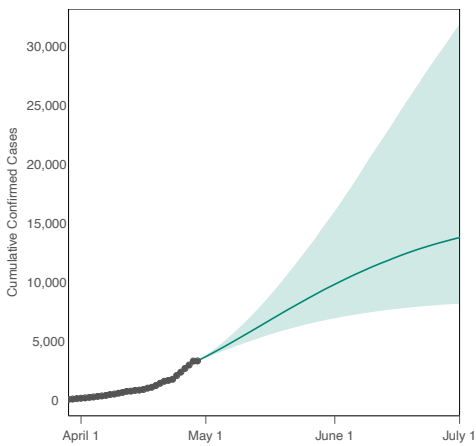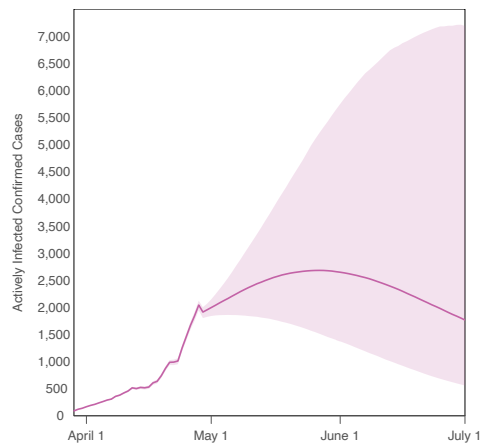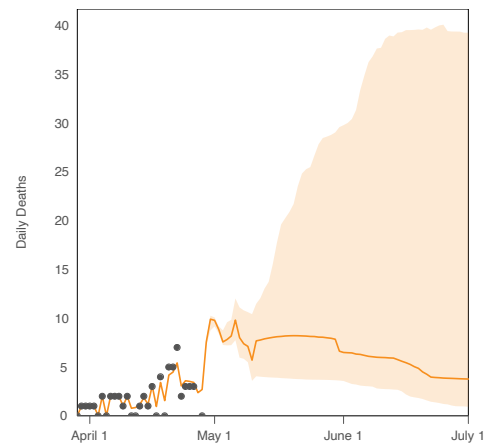

## NEVADA

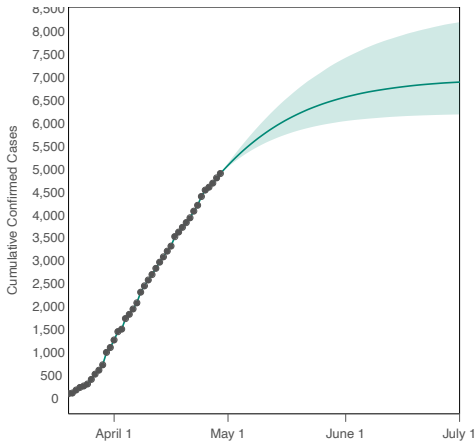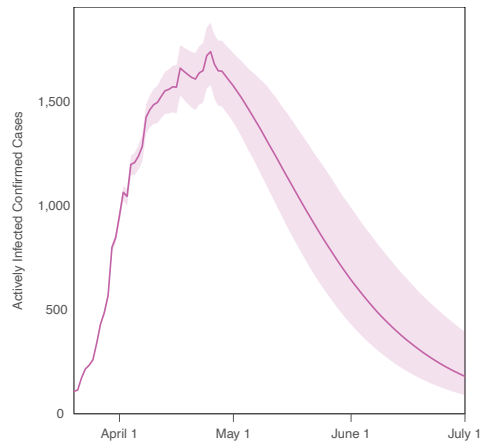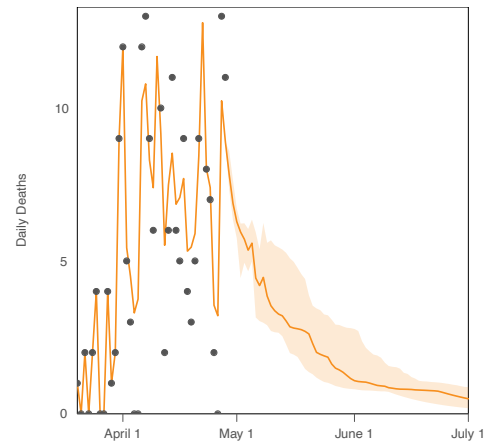

## NEW HAMPSHIRE

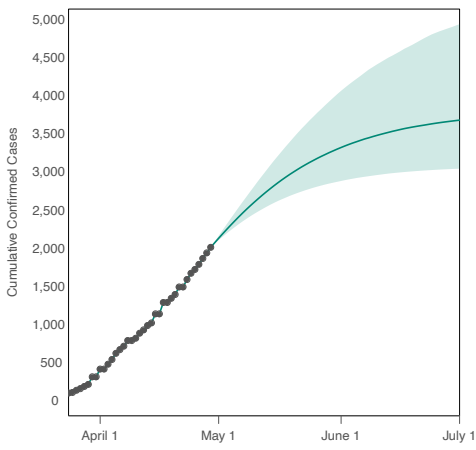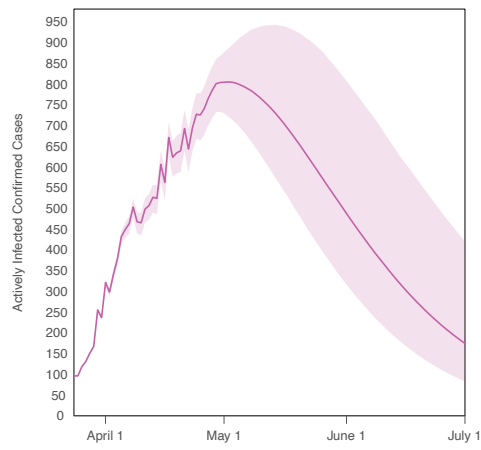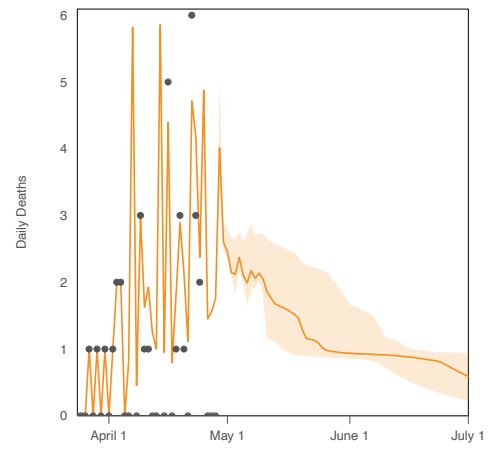

## NEW JERSEY

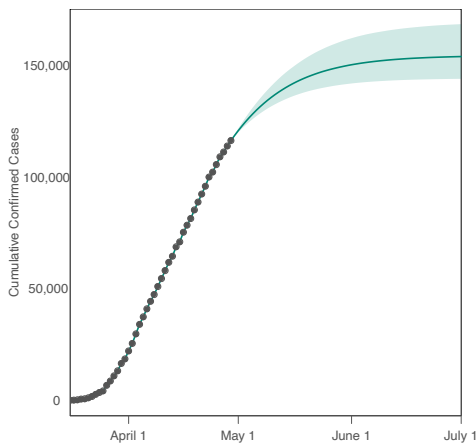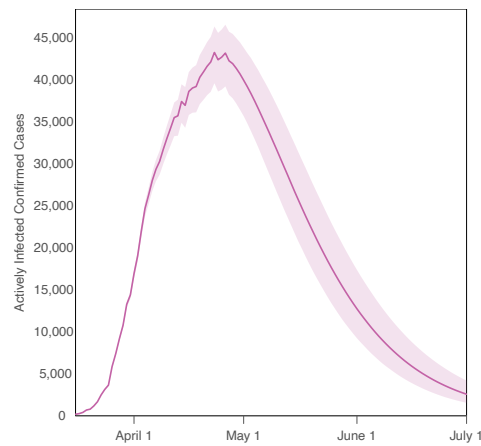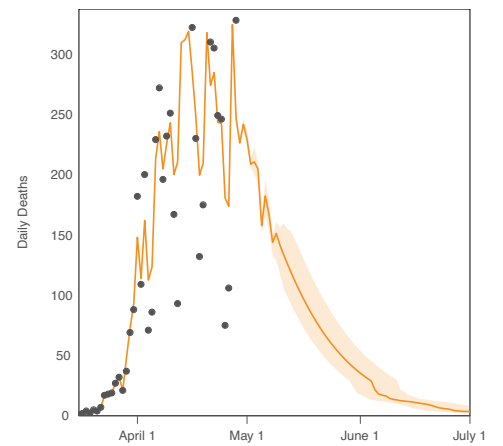

### NEW MEXICO

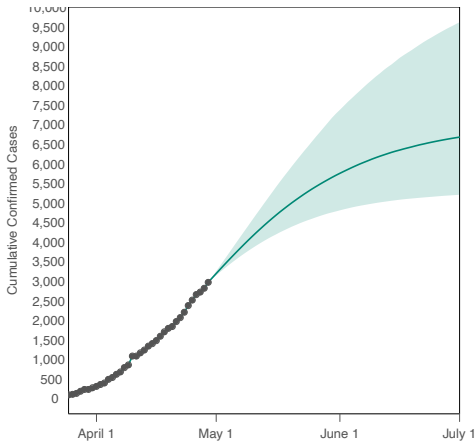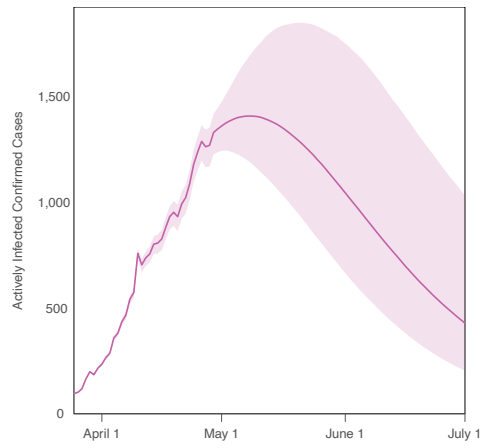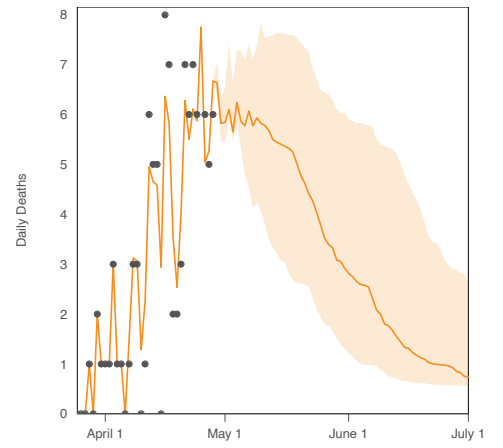

### NEW YORK

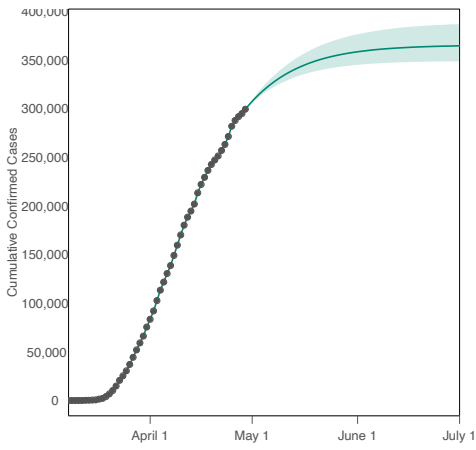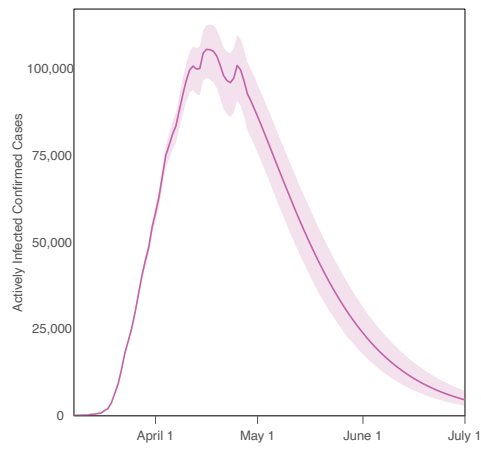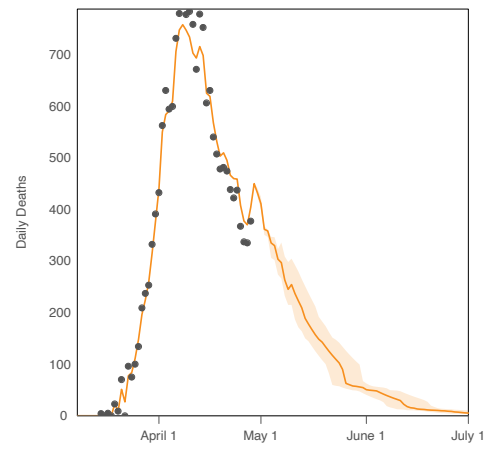

### NORTH CAROLINA

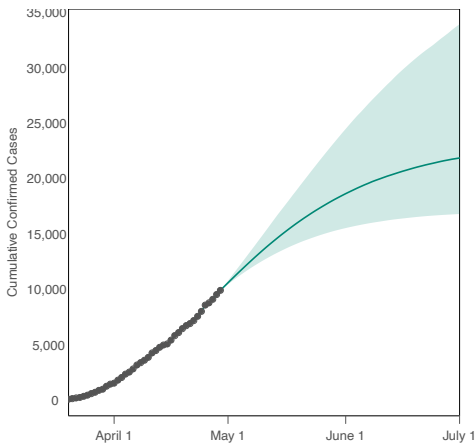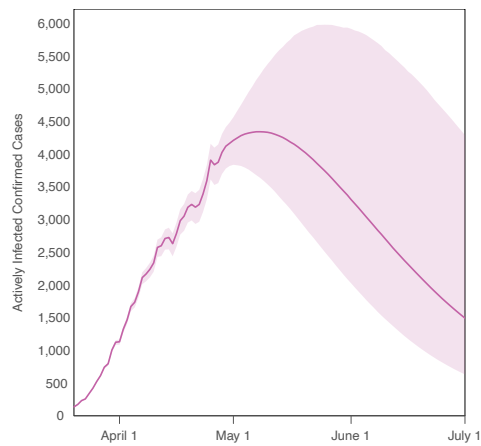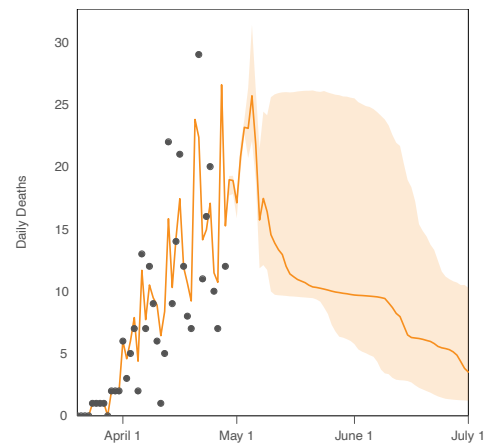

## NORTH DAKOTA

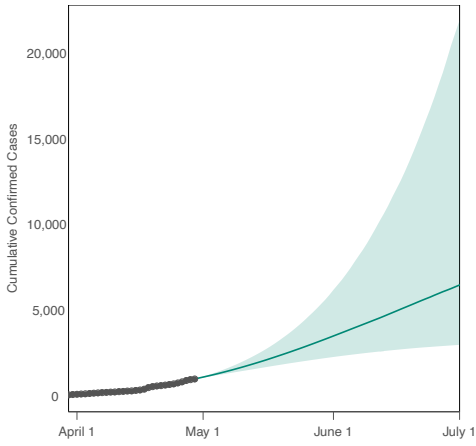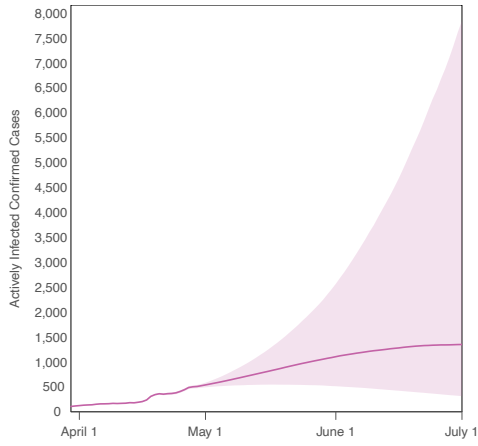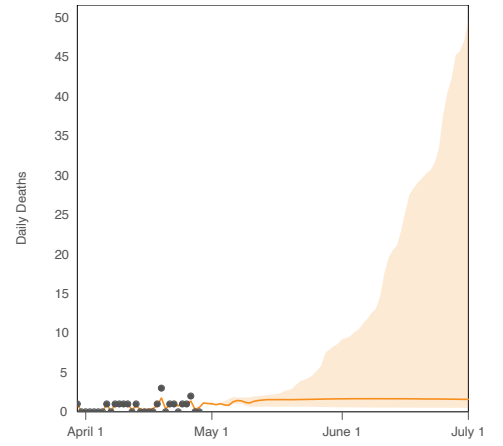

## OHIO

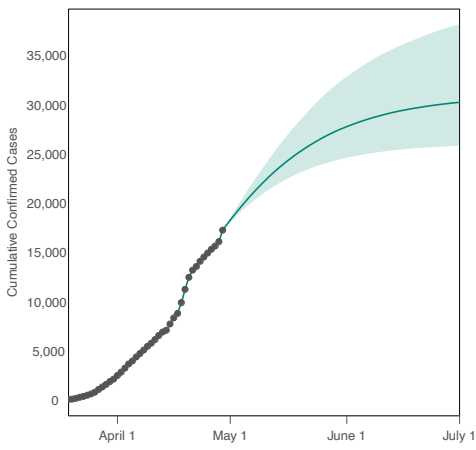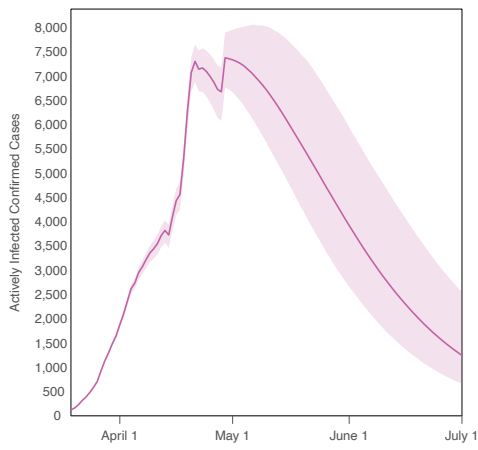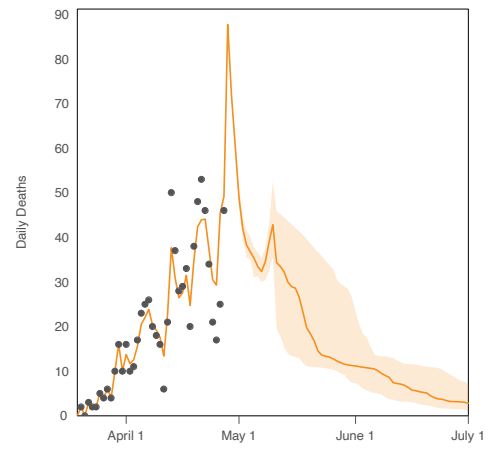

## OKLAHOMA

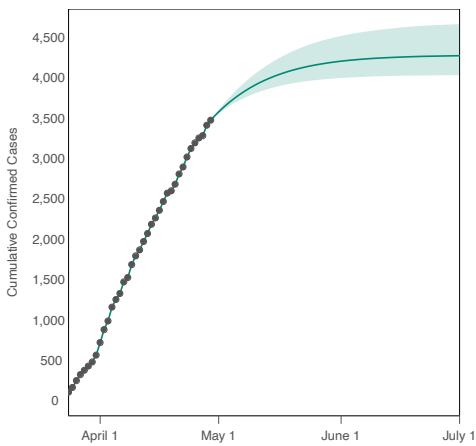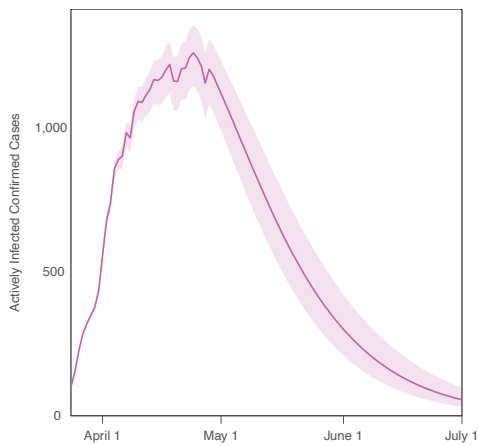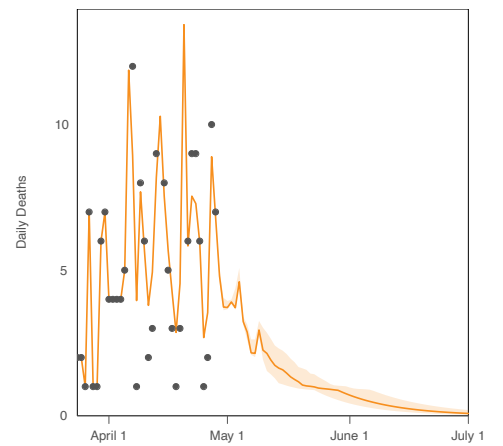

## OREGON

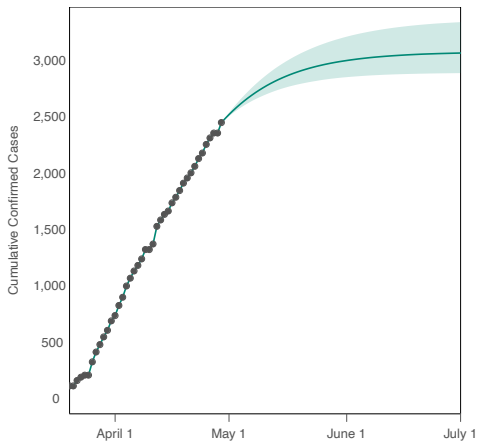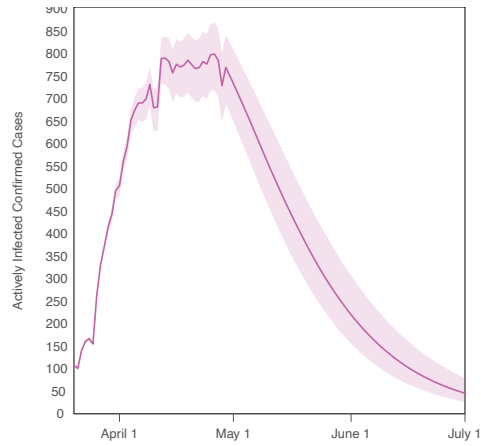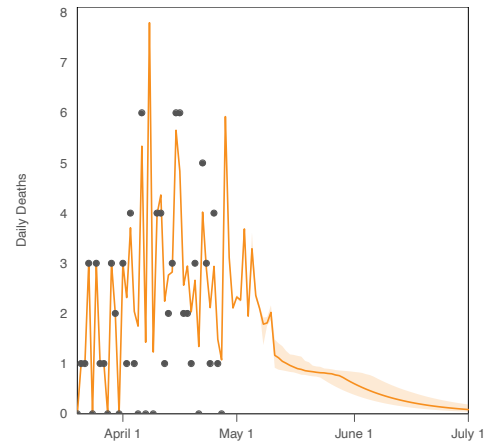

## PENNSYLVANIA

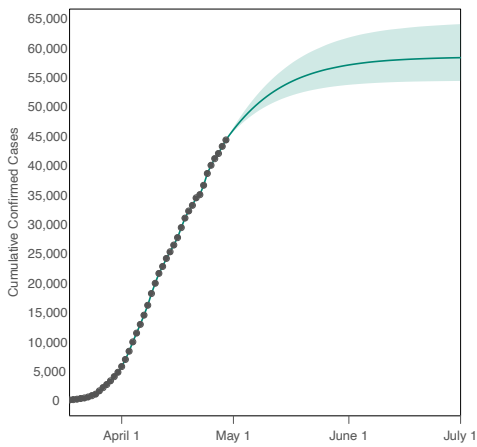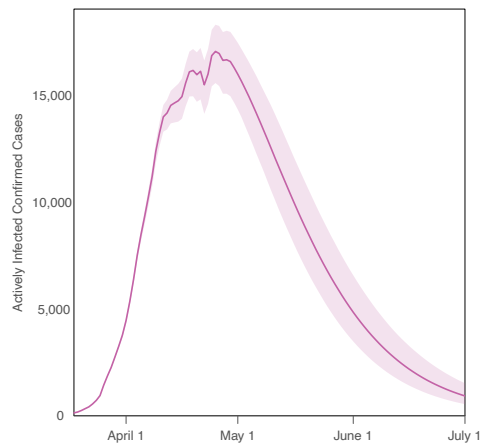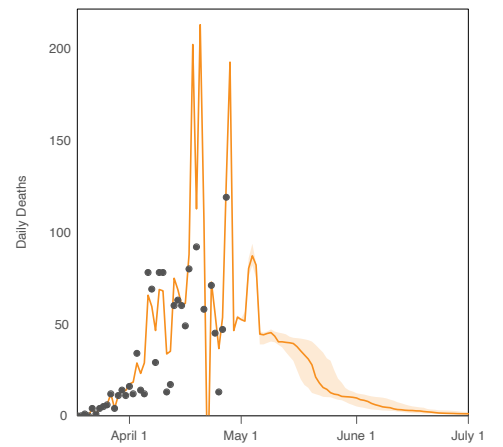

## RHODE ISLAND

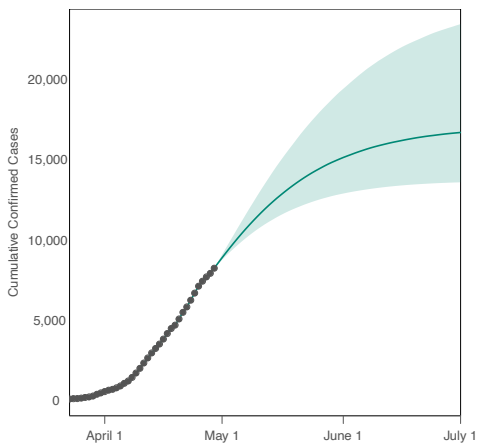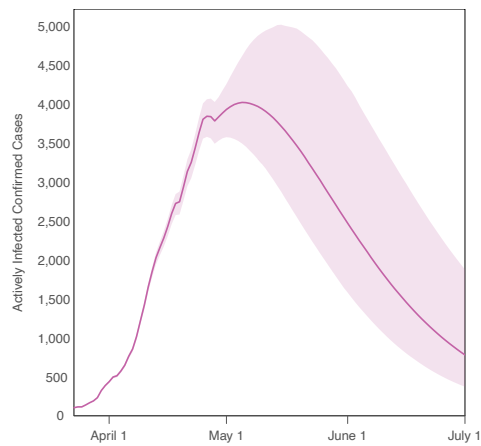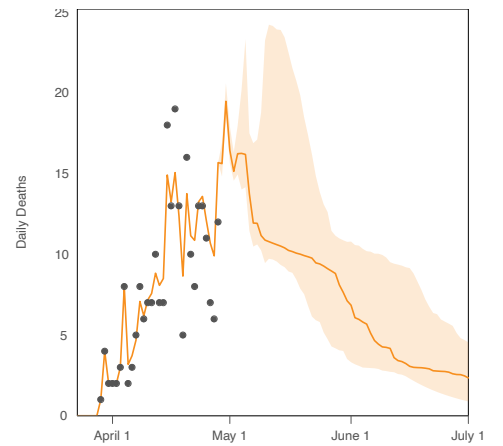

## SOUTH CAROLINA

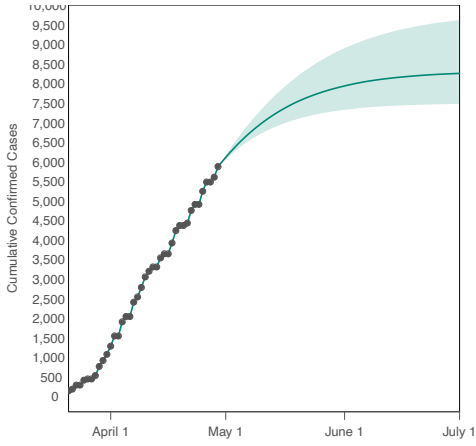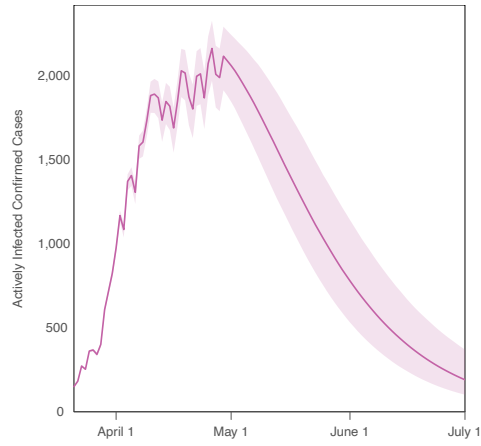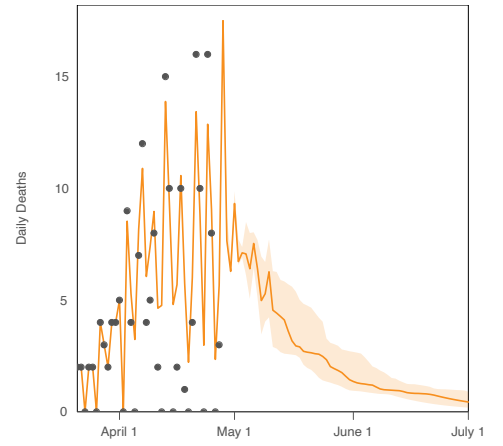

## SOUTH DAKOTA

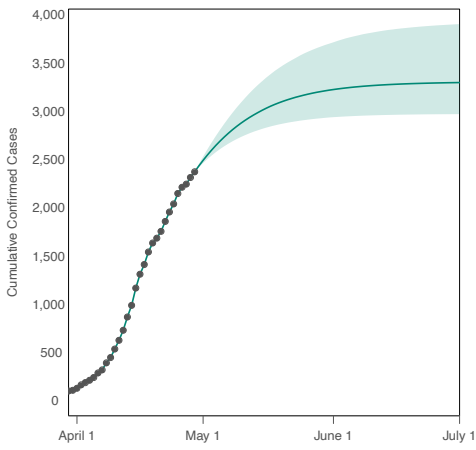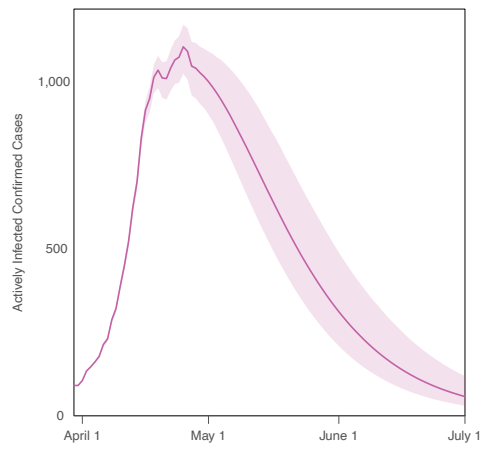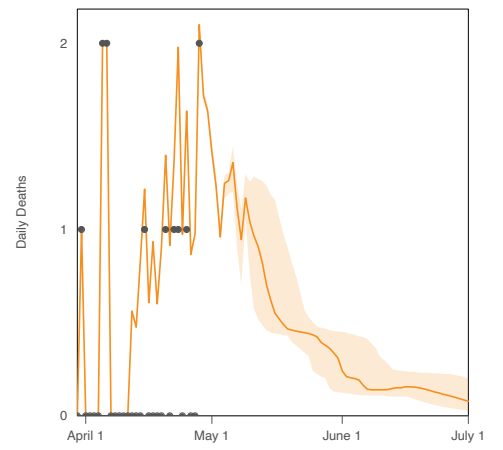

## TENNESSEE

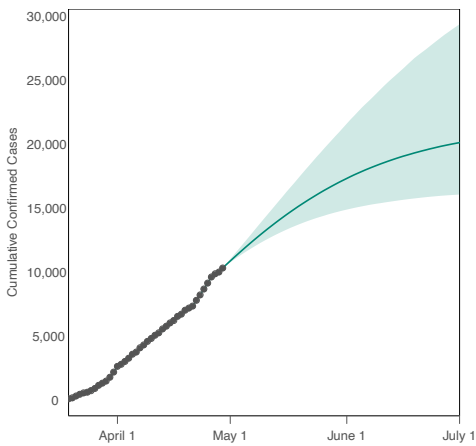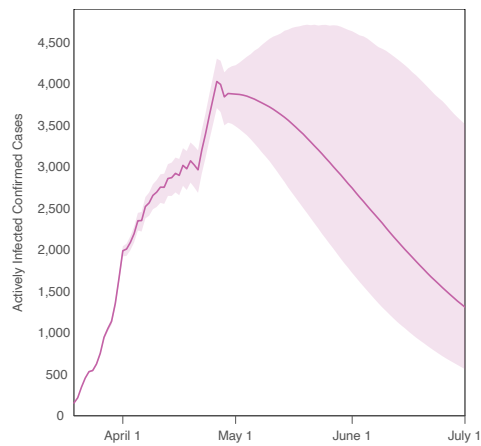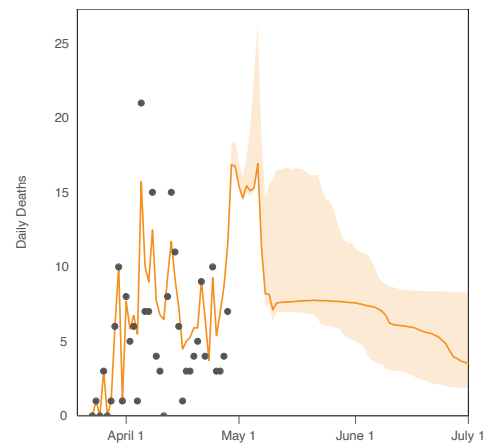

### TEXAS

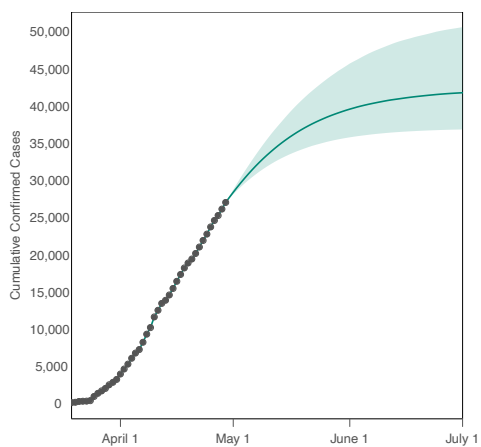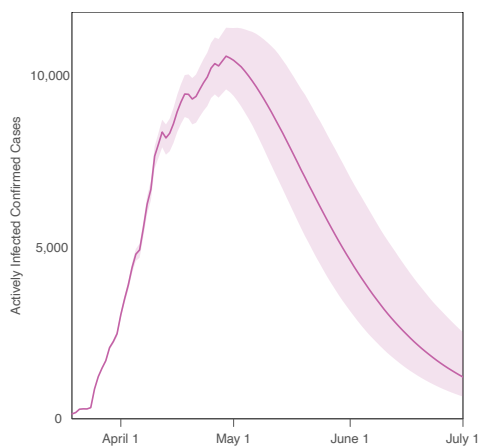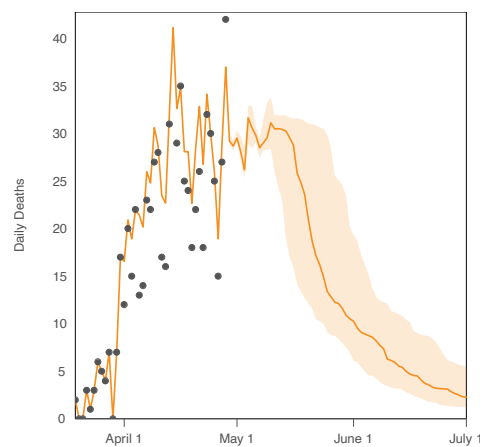

### UTAH

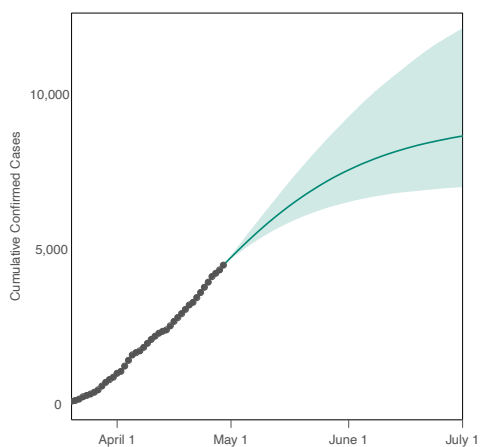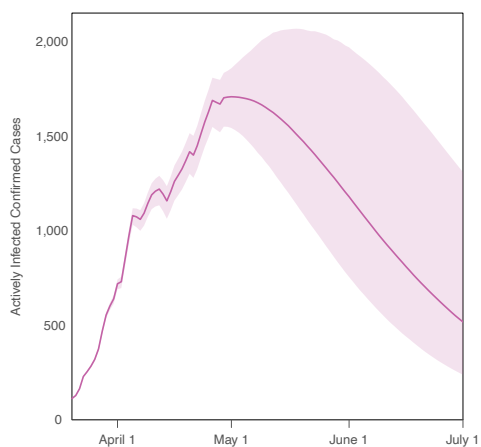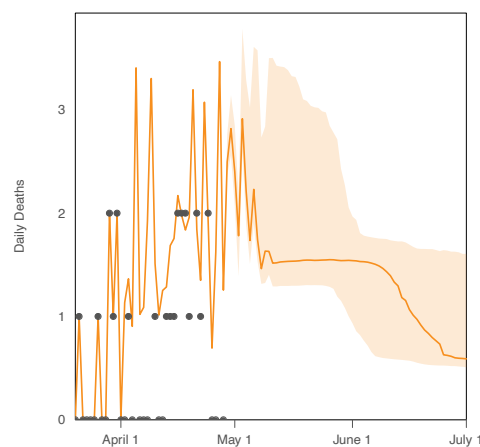

### VERMONT

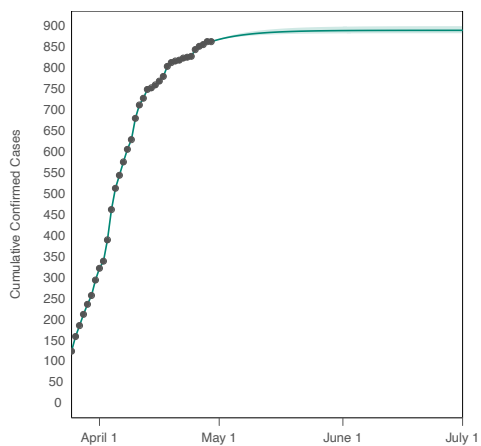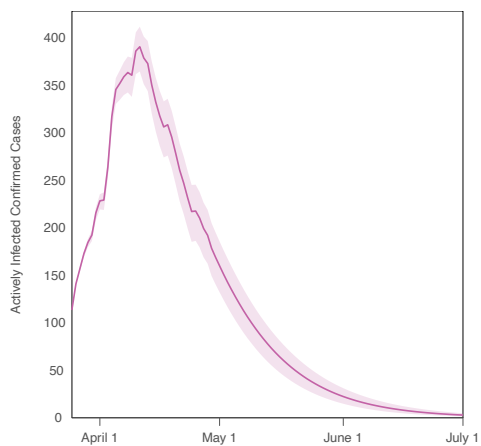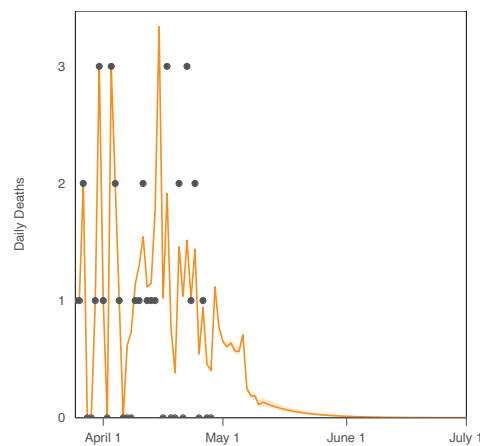

## VIRGINIA

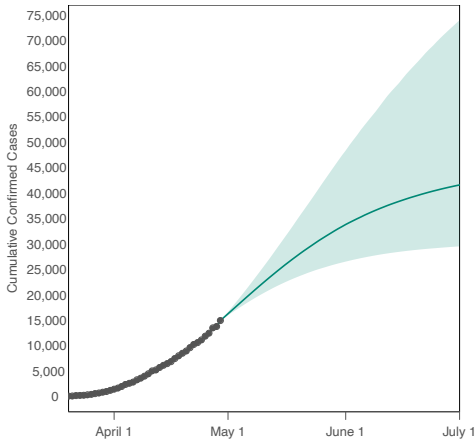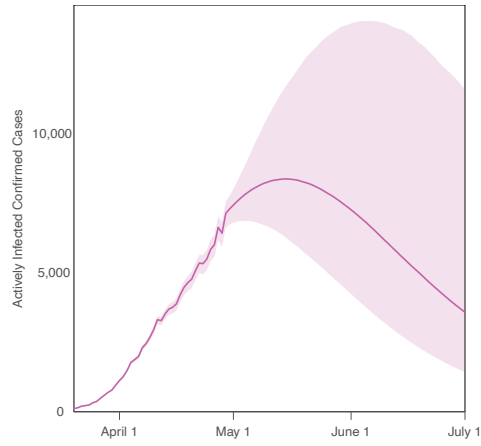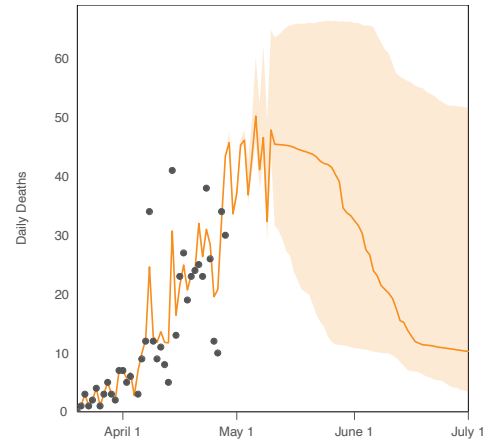

## WASHINGTON

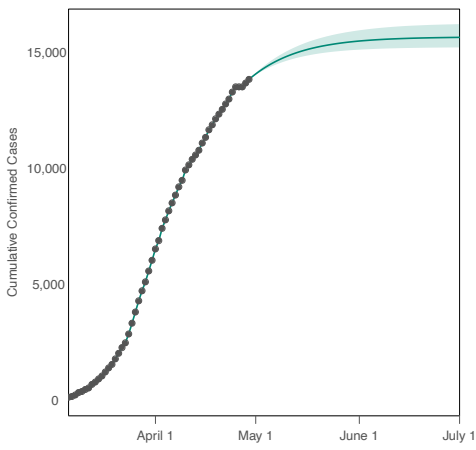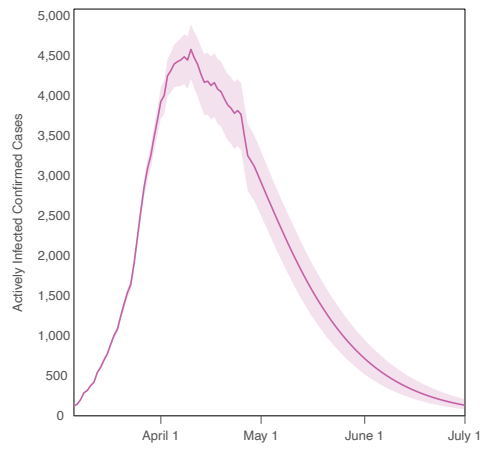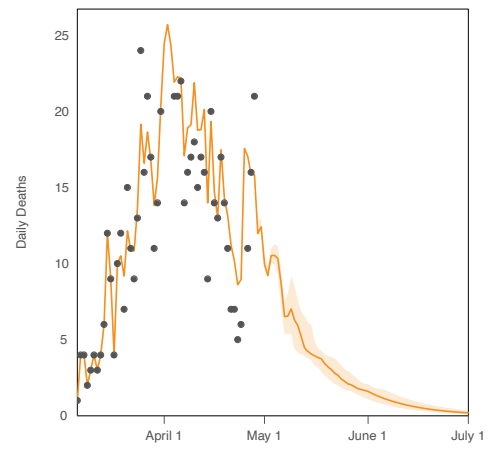

## WEST VIRGINIA

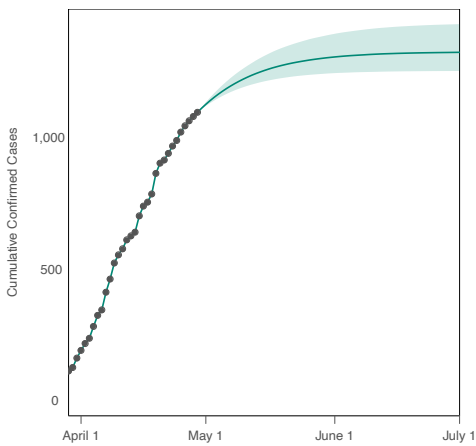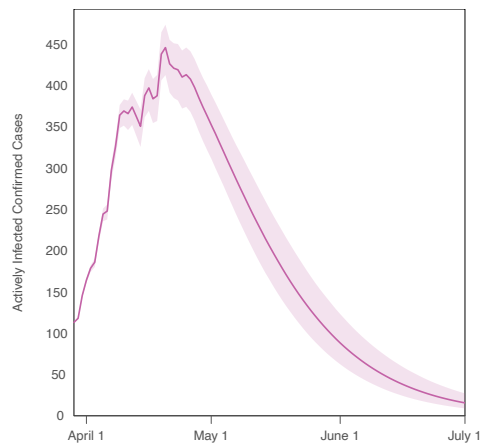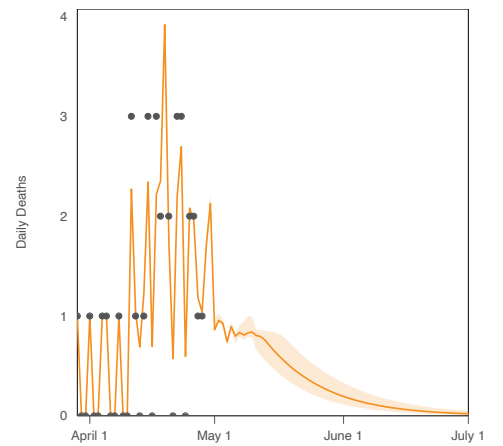



## WISCONSIN

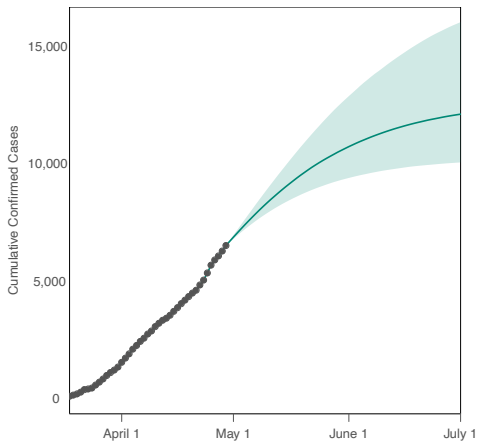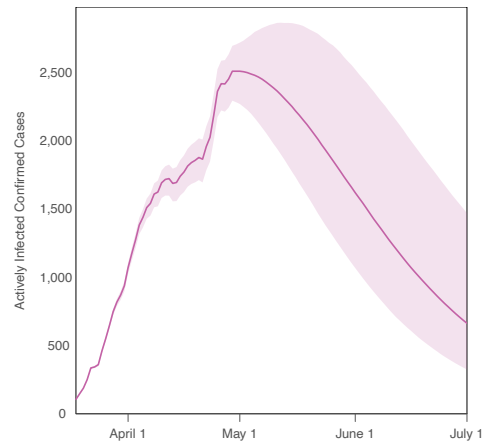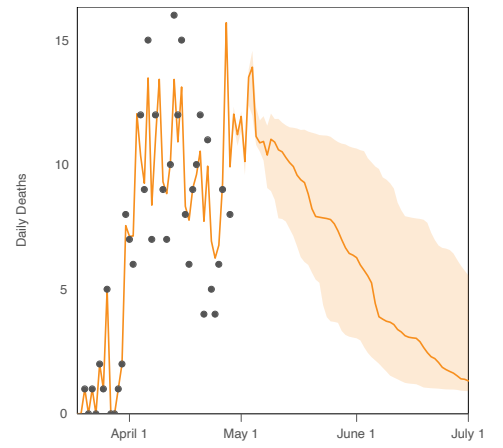

## WYOMING

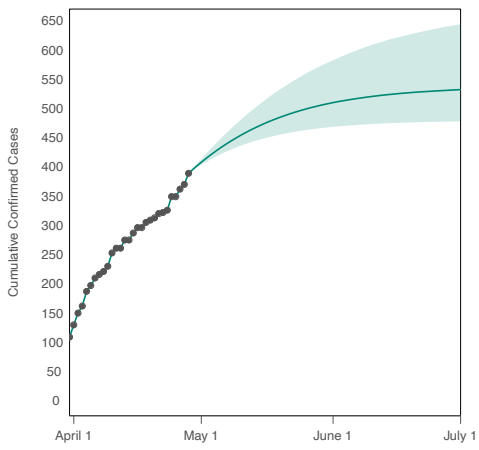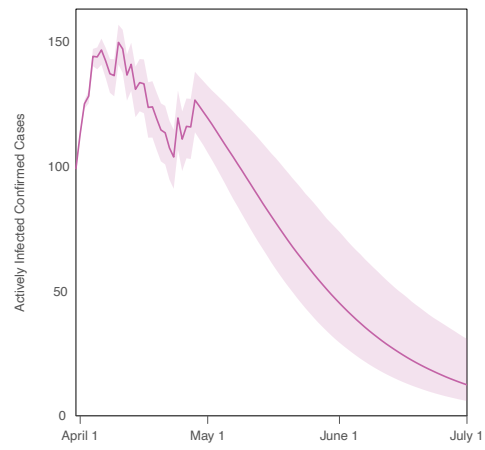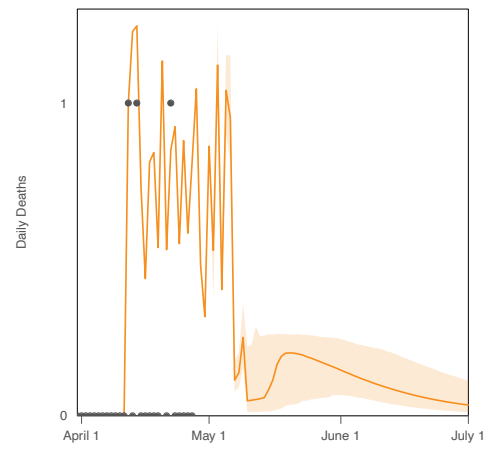

Supplement: Supplementary file [file 2020.05.15.20102608-1.pdf]
